# Supplementary material
Source: Springer Nature journal article supplement (https://www.springermedizin.de/resource/supplementary/12884_2011_500_MOESM2_ESM.pdf/9458006)

### Any Diagnosis - by GA

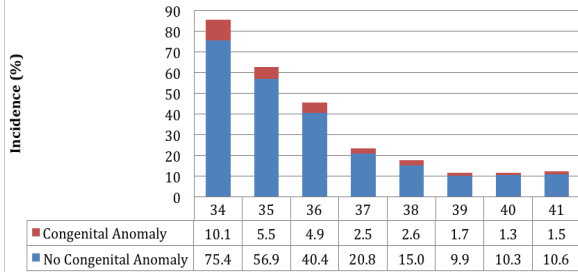

### Respiratory Distress Syndrome (RDS) - by GA

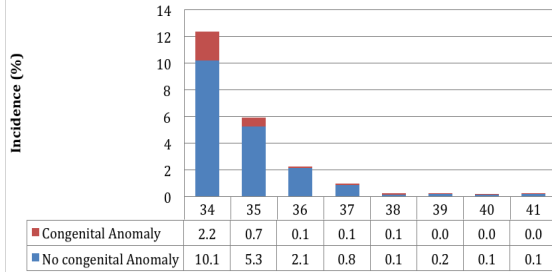

### Other Respiratory Diagnoses - by GA

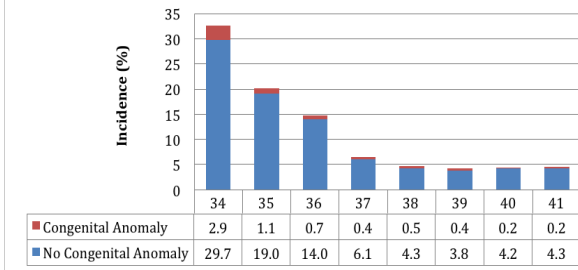

### Other Complications of Prematurity - by GA

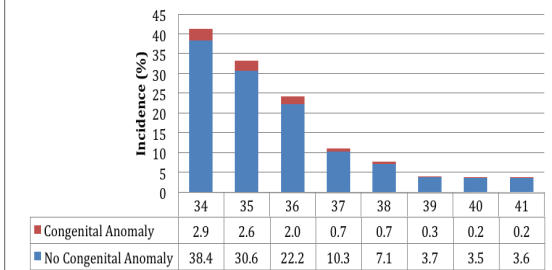

### Any NICU Admission - by GA

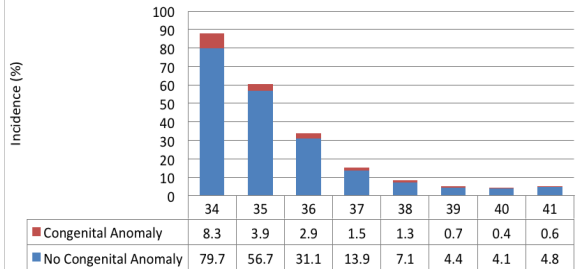

### Receipt of Phototherapy - by GA

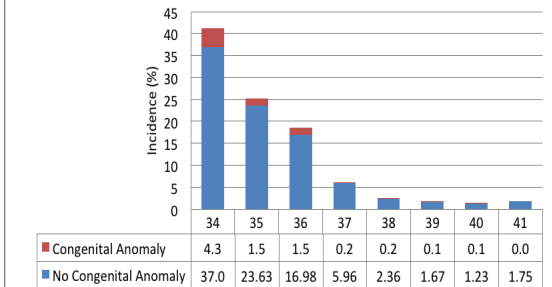

Supplement: MOESM2 [file 9458006]
